# Supplementary material
Source: publisher figshare collection journal article supplement (https://frontiersin.figshare.com/ndownloader/files/33934010)
Supplement: Supplementary file 1 [file 33934010]

## Sheet: Sheet1
Types	Total	C_1	C_2	C_3	S_24_1	S_24_2	S_24_3	S_48_1	S_48_2	S_48_3
Mapped mature	22	16	16	17	17	14	14	17	17	12
Mapped hairpin	23	16	17	17	18	15	15	19	18	12
